# Supplementary material
Source: PubMed Central journal article supplement (PMC8319796)

iScience, Volume 24

## **Supplemental information**

### **Multi-omics analysis of respiratory specimen characterizes baseline molecular determinants associated with SARS-CoV-2 outcome**

**Jaswinder Singh Maras, Shvetank Sharma, Adil Bhat, Sheetalnath Rooge, Reshu  
aggrawal, Ekta Gupta, and Shiv K. Sarin**

1 **Multi-Omics analysis of respiratory specimen characterizes baseline molecular**  
 2 **determinants associated with COVID-19 diagnosis and outcome.**

3 Jaswinder Singh Maras<sup>1\*</sup>, Shvetank Sharma<sup>1</sup>, Adil Bhat<sup>1</sup>, Sheetalnath Rooge<sup>2</sup>, Reshu aggrawal<sup>2</sup>, Ekta  
 4 Gupta<sup>#2</sup> and Shiv K Sarin<sup>#1, 3\*</sup>

5 <sup>1</sup>Department of Molecular and Cellular Medicine, <sup>2</sup>Department of Virology and <sup>3</sup>Department of  
 6 Hepatology, Institute of Liver and Biliary Sciences, New Delhi, India.

7

8 **Supplementary Figures:**

9 **Supplementary Figure 1:** Heat map and hierarchical cluster analysis for the viral proteins  
 10 identified (p<0.05) show clear segregation of COVID-19 positive (Red bar) from COVID-19  
 11 negative (Green bar) patients. The expression is given in the range as Dark brown= upregulated,  
 12 Blue= downregulated and white= unregulated. AUROC analysis shows clear distinction of  
 13 SARS-COV2 proteins in Positive patients vs. negative patients. **(Related to Figure 1)**

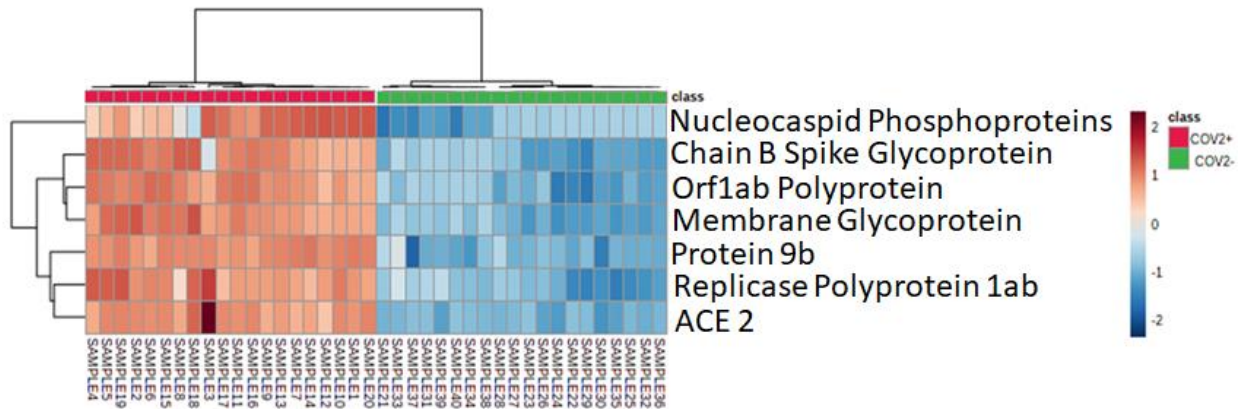

14

| SARS-COV2 proteins                    | AUC  | P-value  | FC (LOG) |
|---------------------------------------|------|----------|----------|
| Membrane Glycoprotein                 | 1.00 | 1.50E-25 | 11.790   |
| Orf1ab polyprotein                    | 0.99 | 3.22E-23 | 11.876   |
| Neucelocapsid Phospoprotein           | 0.99 | 5.22E-25 | 11.783   |
| Chain B SARS-CoV-2 spike glycoprotein | 0.99 | 1.92E-20 | 11.644   |
| ACE2                                  | 0.99 | 6.77E-23 | 11.605   |
| Replicase polyprotein 1ab             | 0.98 | 1.90E-19 | 11.588   |
| Protein 9b                            | 0.98 | 4.17E-24 | 10.904   |

15

16

1 **Supplementary Figure 2:** Schema for proteomic sample preparation used in the study. (Related  
2 to Figure 1)

3

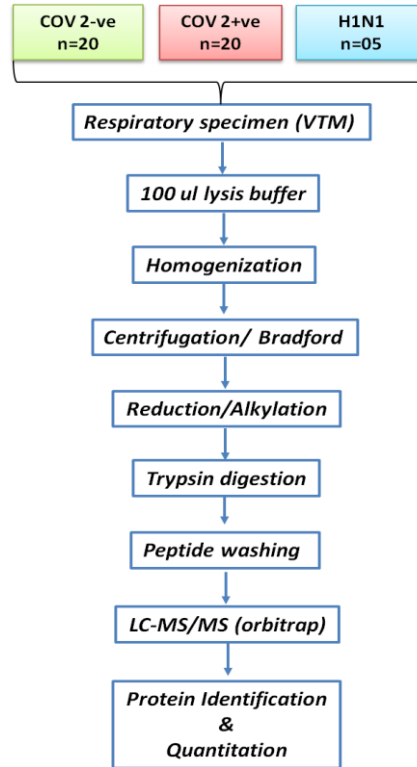

4

5

6 **Supplementary Figure 3:** Loading plot for the partial least square discriminant analysis  
7 showing clear segregation of COVID-19 positive patients from COVID-19 negative and  
8 Influenza A H1N1 pdm 2009 positive patients based on proteomic evaluation (Related to  
9 Figure 1)

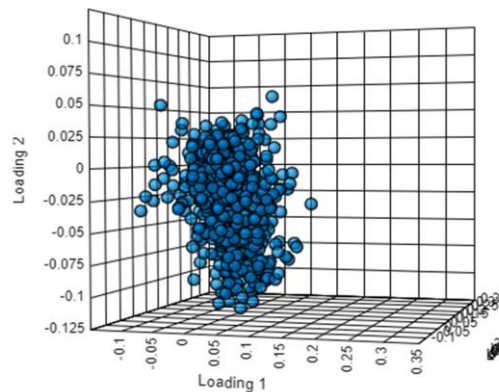

10

11

1 **Supplementary Figure 4:** Total no of proteins differentially regulated and their intersection in  
2 COV2+ vs. COV2- and COV2+ vs. Influenza A H1N1 pdm 2009 positive cases is shown. Red  
3 denotes proteins up regulated and green denoted the proteins down regulated. **(Related to**  
4 **Figure 1)**

5

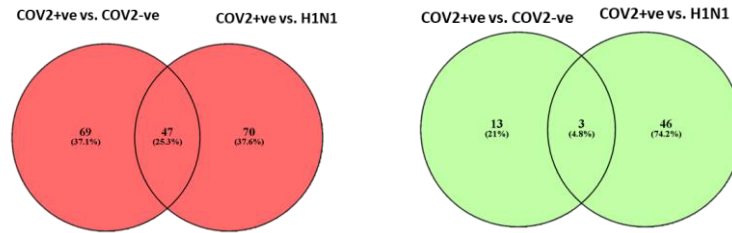

6

7

8 **Supplementary Figure 5:** Univariate area under the receiver operating curve analysis for MX1  
9 (AUC=0.895 CI (0.75-1)) and WARS (AUC=0.948 CI (0.85-1)) **(Related to Figure 1)**

10

11

12

13

14

15

16

17

18

19

20

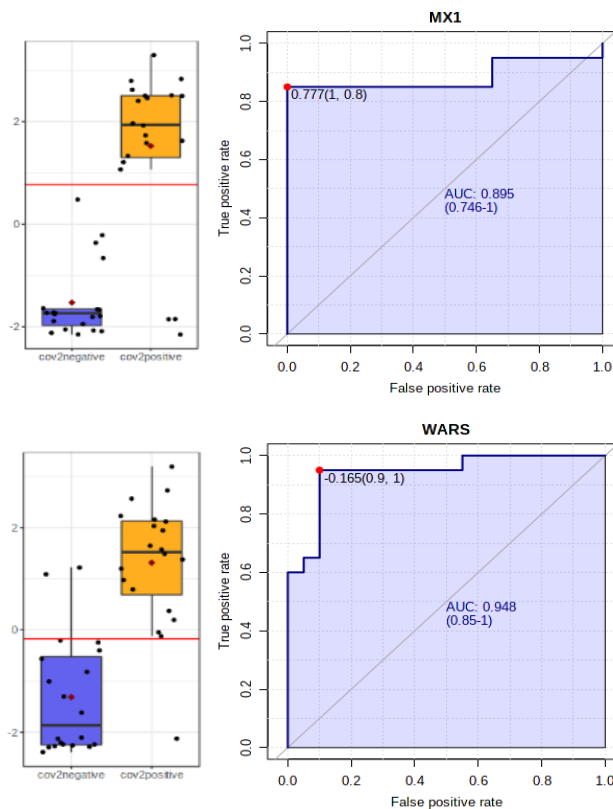

1 **Supplementary Figure 6:** A hierarchical clustering tree summarizing the correlation among  
2 significant pathways upregulated in COVID-19 positive respiratory specimen compared to  
3 COVID-19 negative or Influenza A H1N1 pdm 2009 positive cases. Pathways with many shared  
4 genes are clustered together. Bigger dots indicate more significant P-values. **(Related to Figure**  
5 **1)**

### KEGG pathway analysis top 30 FDR 0.05

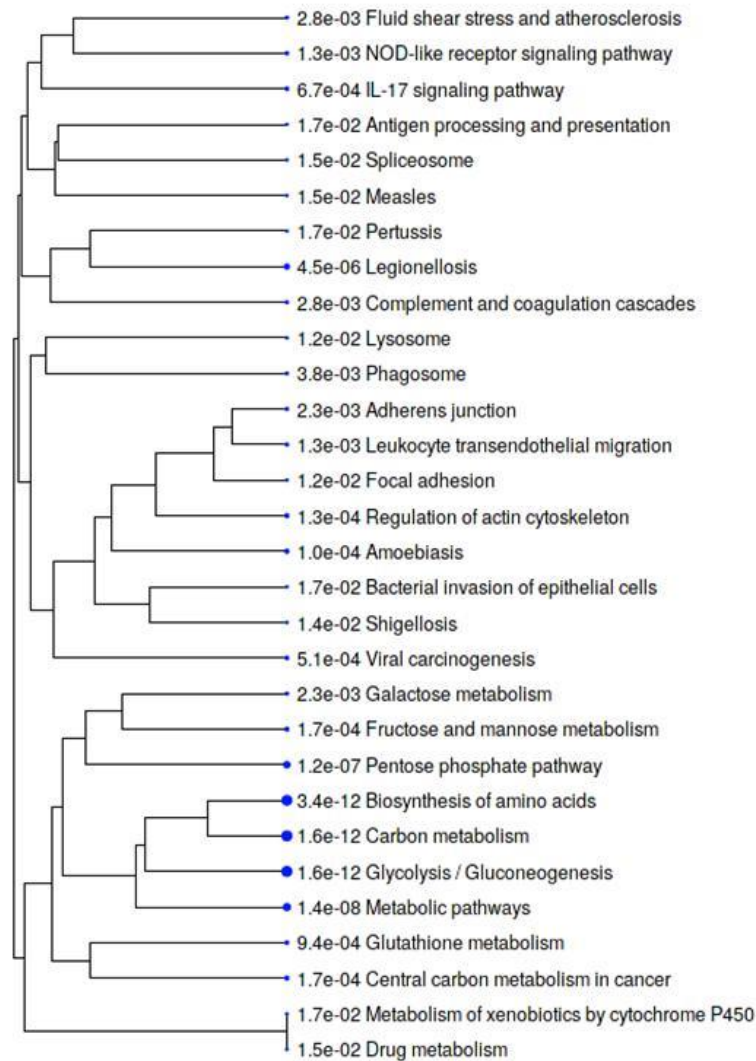

6

7

1 **Supplementary Figure 7:** A hierarchical clustering tree summarizing the correlation among  
 2 significant pathways upregulated in COVID-19 positive respiratory specimen compared to  
 3 COVID-19 negative or Influenza A H1N1 pdm 2009 positive cases. Pathways with many shared  
 4 genes are clustered together. Bigger dots indicate more significant P-values. (**Related to Figure**  
 5 **1)**

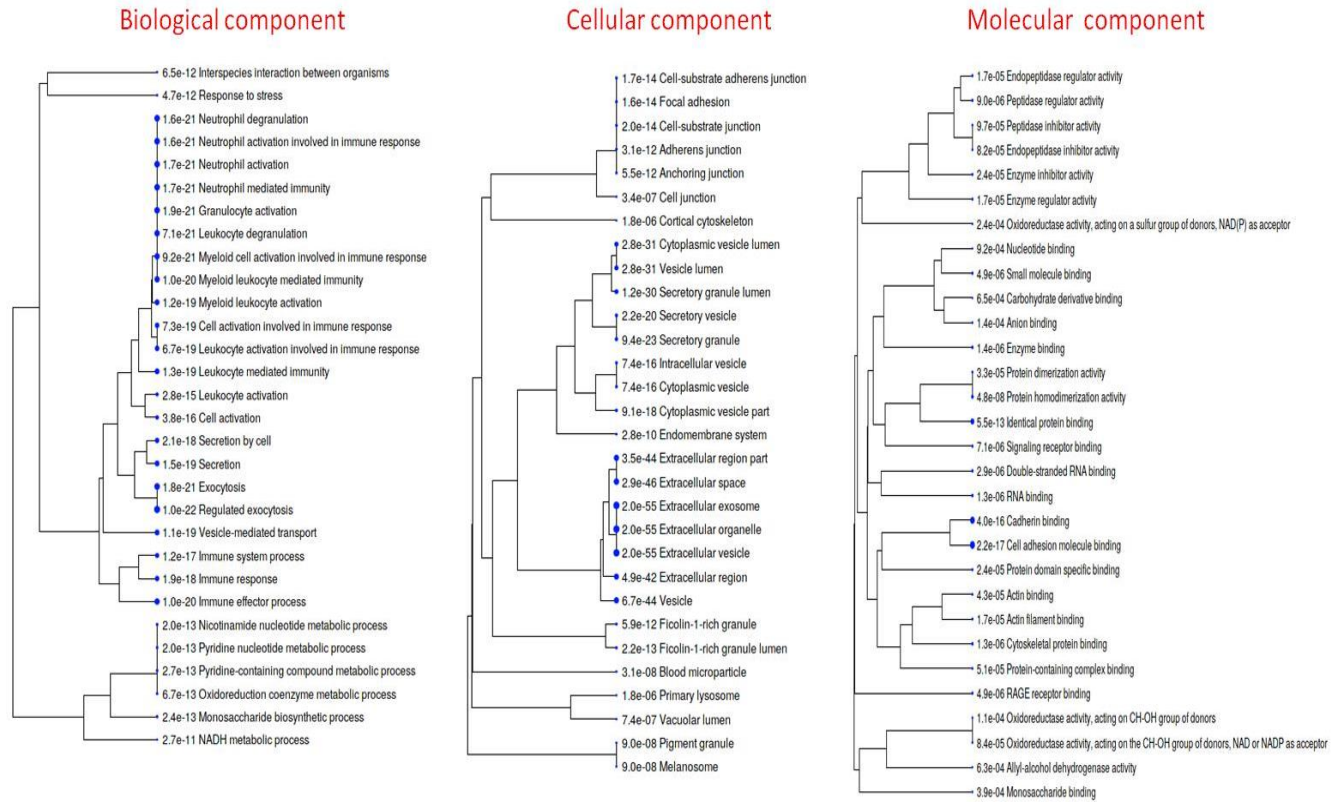

6

7

1 **Supplementary Figure 8:** A hierarchical clustering tree summarizing the correlation among  
 2 significant pathways downregulated in COVID-19 positive respiratory specimen compared to  
 3 COVID-19 negative or Influenza A H1N1 pdm 2009 positive cases. Pathways with many shared  
 4 genes are clustered together. Bigger dots indicate more significant P-values. **(Related to Figure**  
 5 **1)**

6

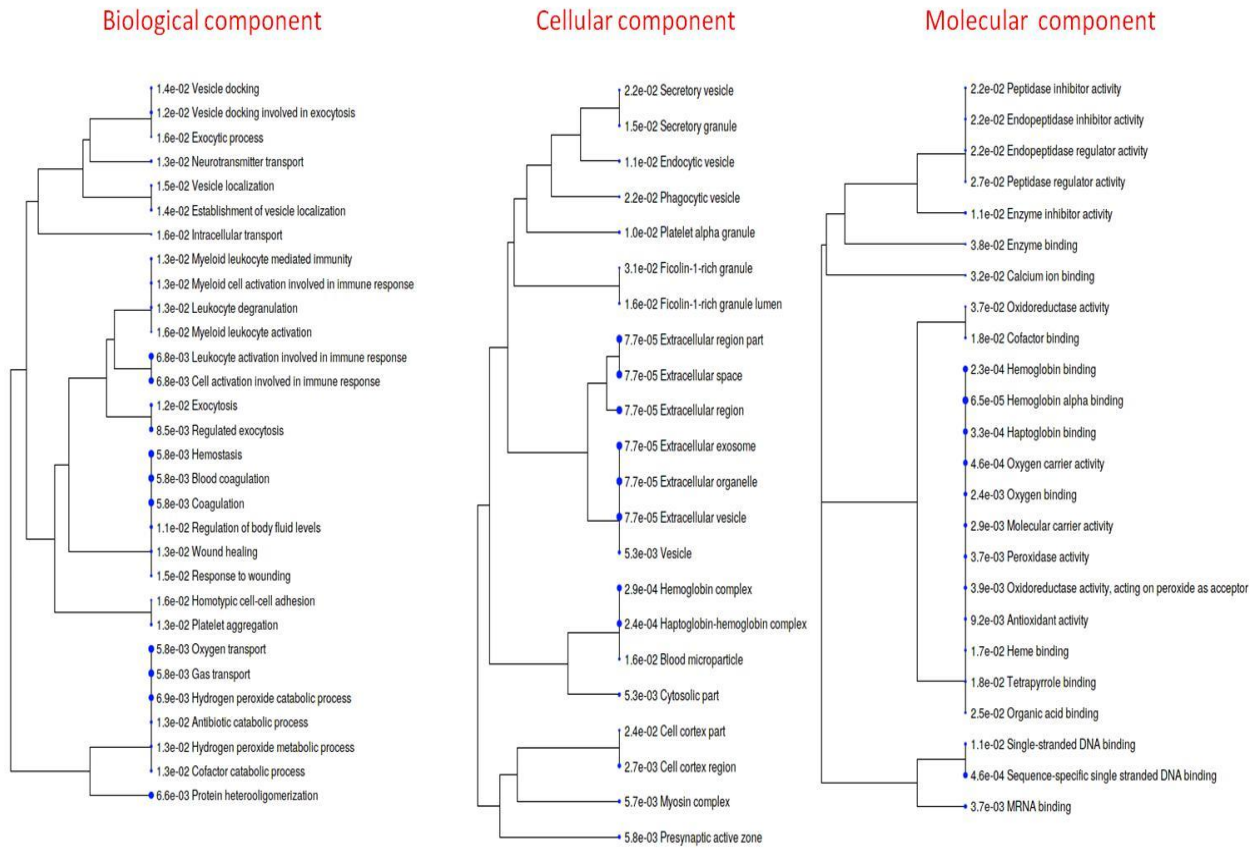

7

8

1 **Supplementary Figure 9:** Schema for metaproteomics analysis used in the study (**Related to**  
 2 **Figure 1**)

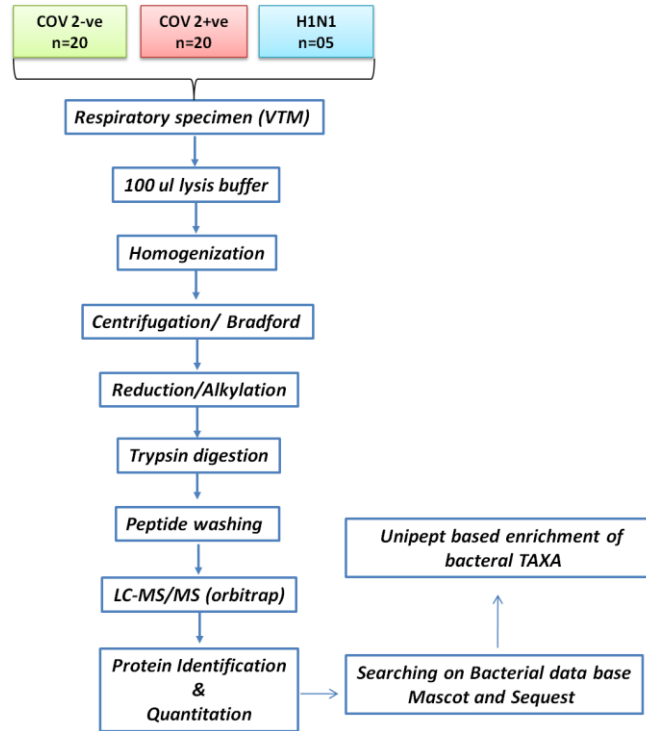

3  
4

5 **Supplementary Figure 10:** Alpha diversity index calculated based on the relative abundance of  
 6 bacterial peptides identified in COVID-19 positive respiratory specimen as compared to COVID-  
 7 19 negative or Influenza A H1N1 pdm 2009 positive cases (p-value  $\ast = < 0.05$ ). (**Related to**  
 8 **Figure 1**)

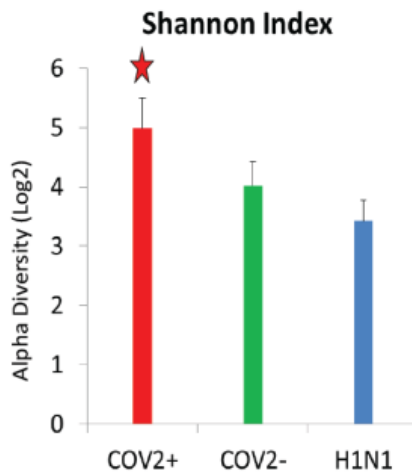

9  
10



1 **Supplementary Figure 11:** Linear discriminant analysis showing log2 levels of the identified  
 2 bacterial peptides in the respiratory specimen of COVID-19 positive compared to COVID-19  
 3 negative (Red) and COVID-19 positive compared to Influenza A H1N1 pdm 2009 positive cases  
 4 (Blue). The Linear discriminating analysis showed that COVID-19 positive respiratory  
 5 specimen has significantly increased bacterial peptide linked to the (phylum: LCA);  
 6 Bacteroidetes: Bacteroidetes Order II. Incertae sedis, Firmicutes: Bacillales, Bacillus subtilis,  
 7 Lactobacillus plantarum, Proteobacteria: Burkholderiales, Enterobacterales, Klebsiella  
 8 pneumonia and others, Tenericutes: Mycoplasma genitalium, Mycoplasma mobile and others  
 9 whereas bacterial peptide linked to Actinobacteria: Corynebacteriales, Streptomycetales,  
 10 Firmicutes: Bacillus subtilis, Lysinibacillus, Lactobacillus salivarius and others, Proteobacteria :  
 11 Gamma proteobacteria, pseudomonadales and others and Tenericutes:Mycoplasmatales were  
 12 significantly reduced as compared to other groups (**Related to Figure 1**)

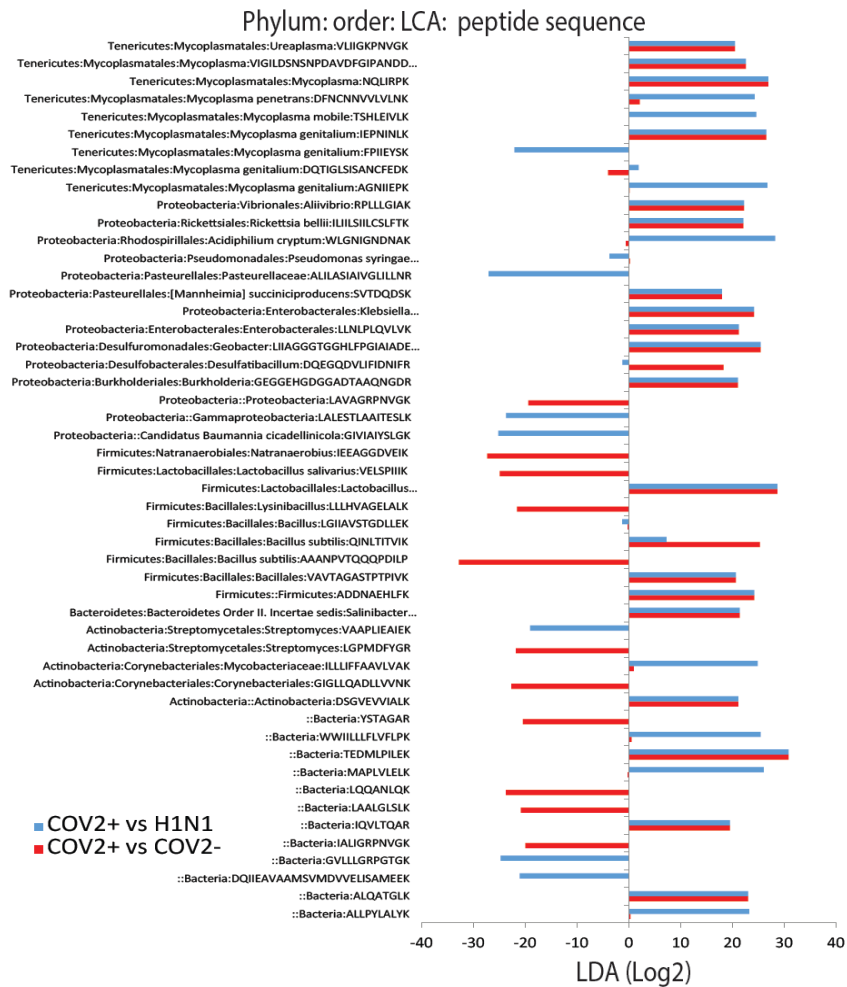

13

14

15

1 **Supplementary Figure 12:** Random forest analysis and mean decrease in accuracy plot showing  
 2 the mean decrease in accuracy of the metaproteome along with their expression status Red=  
 3 upregulated and Green= downregulated and yellow= unchanged in COVID-19 positive as  
 4 compared to COVID-19 negative or Influenza A H1N1 pdm 2009 positive cases patients  
 5 **(Related to Figure 1)**

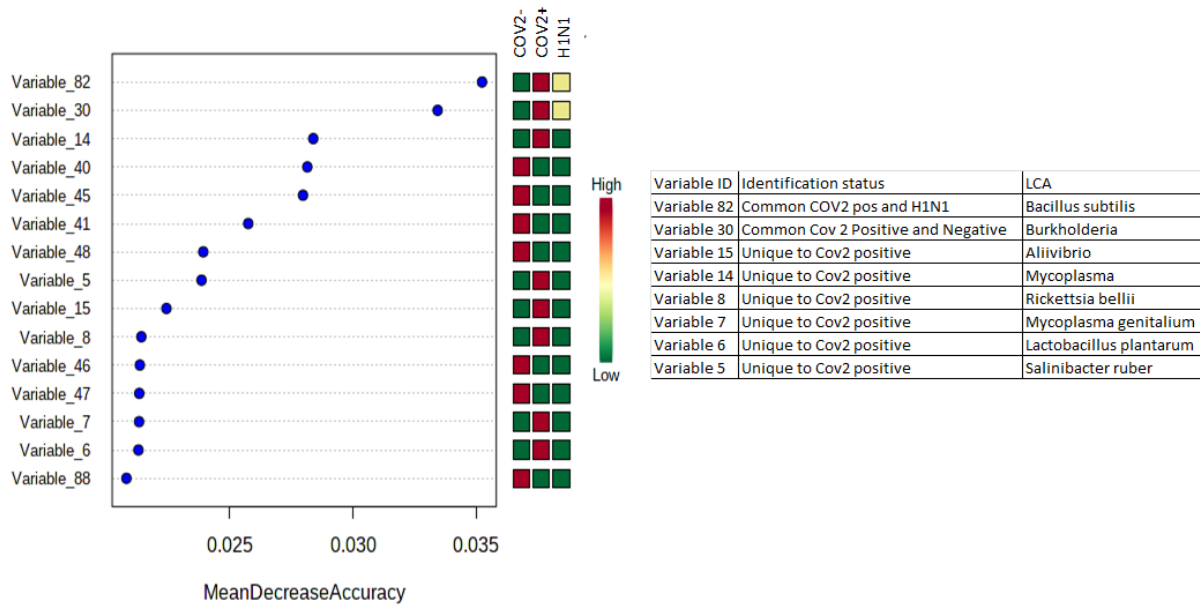

6  
 7 **Supplementary Figure 13:** Area under the receiver operating curve analysis for Variable 80 and  
 8 Variable 30 together show AUC=1 CI (1-1) p<0.05 and Prediction class probability with a  
 9 predictive accuracy of 100%. **(Related to Figure 1)**

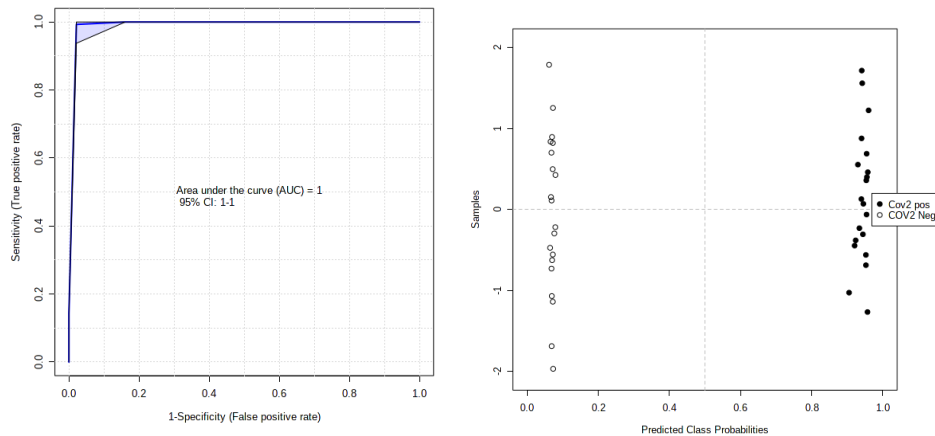

10  
 11

1 **Supplementary Figure 14:** Enzyme coded by the bacterial peptides and their abundance in  
 2 COVID-19 positive compared to COVID-19 negative and COVID-19 positive compared to  
 3 Influenza A H1N1 pdm 2009 positive cases (Red shows upregulated and Green shows down  
 4 regulated). Functionality analysis of the COVID-19 positive respiratory microbiome highlighted  
 5 significant increase in enzymes linked to pantothenate and CoA biosynthesis in actinobacteria  
 6 (EC1.1.1.86), aminoacyl-trna biosynthesis and terpenoid backbone biosynthesis in firmicutes  
 7 (EC6.1.1.20, EC1.17.7.4), amino-nucleotide sugar metabolism, peptidoglycan biosynthesis, fatty  
 8 acid biosynthesis and glycerophospholipid metabolism, energy metabolism and others  
 9 (EC2.3.1.157, EC2.4.1.227, EC1.1.1.37, EC2.3.1.15, EC2.1.3.15, EC7.1.2.2, EC4.1.1.20) in  
 10 proteobacteria and others showing a clear indication of bacterial pathogenic thrust in presence of  
 11 CoV-2. Whereas enzyme linked to nicotinate and nicotinamide metabolism (EC2.7.1.23) in  
 12 actinobacteria, arginine biosynthesis (EC3.5.1.5) in firmicutes, and Aminoacyl-tRNA  
 13 biosynthesis linked to aspartate and asparagine metabolism in tenericute were decreased  
 14 ((Related to Figure 1)

| Taxa           | COV2+ vs. COV-<br>COV2+ vs. H1N1 | Phylum: LCA:EC:Enzyme                                                                                              |
|----------------|----------------------------------|--------------------------------------------------------------------------------------------------------------------|
| Actinobacteria | Red                              | Actinobacteria:Actinobacteria:1.1.1.86 :Ketol-acid reductoisomerase (NADP(+))                                      |
|                | Green                            | Actinobacteria:Streptomyces:2.7.1.23 :NAD(+) kinase                                                                |
| Bacteria       | Green                            | :Bacteria:4.1.1.3 :Transferred entry: 4.1.1.112                                                                    |
|                | Green                            | :Bacteria:5.1.3.14 :UDP-N-acetylglucosamine 2-epimerase (non-hydrolyzing)                                          |
|                | Red                              | :Bacteria:3.6.3.- :Acting on acid anhydrides; catalyzing transmembrane movement of substances                      |
|                | Red                              | :Bacteria:2.3.1.234 :N(6)-L-threonylcarbamoyladenine synthase                                                      |
|                | Red                              | :Bacteria:2.3.3.13 :2-isopropylmalate synthase                                                                     |
|                | Green                            | :Bacteria:2.7.4.25 :(d)CMP kinase                                                                                  |
|                | Green                            | :Bacteria:3.4.24.- :Metalloendopeptidases                                                                          |
|                | Green                            | :Bacteria:2.7.7.6 :DNA-directed RNA polymerase                                                                     |
|                | Green                            | :Bacteria:3.4.24.- :Metalloendopeptidases                                                                          |
|                | Bacteroidetes                    | Red                                                                                                                |
| Firmicutes     | Red                              | Firmicutes:Lactobacillus plantarum:6.1.1.20 :Phenylalanine--tRNA ligase                                            |
|                | Red                              | Firmicutes:Bacillales:1.17.7.4 :4-hydroxy-3-methylbut-2-enyl diphosphate reductase                                 |
|                | Green                            | Firmicutes:Lysinibacillus:3.5.1.5 :Urease                                                                          |
| Proteobacteria | Green                            | Firmicutes:Bacillus:2.3.1.- :Transferring groups other than amino-acyl groups                                      |
|                | Red                              | Proteobacteria:Acidiphilium cryptum:2.3.1.157 :Glucosamine-1-phosphate N-acetyltransferase                         |
|                | Red                              | Proteobacteria:Geobacter:2.4.1.227 :Undecaprenyldiphospho-muramoylpentapeptide beta-Nacetylglucosaminyltransferase |
|                | Red                              | Proteobacteria:Klebsiella pneumoniae:1.1.1.37 :Malate dehydrogenase                                                |
|                | Red                              | Proteobacteria:Enterobacterales:2.3.1.15 :Glycerol-3-phosphate 1-O-acyltransferase                                 |
|                | Red                              | Proteobacteria:Burkholderia:5.2.1.8 :Peptidylprolyl isomerase                                                      |
|                | Red                              | Proteobacteria:[Mannheimia] succiniciproducens:2.1.3.15 :Acetyl-CoA carboxytransferase                             |
|                | Red                              | Proteobacteria:Desulfatibacillum:7.1.2.2 :H(+)-transporting two-sector ATPase                                      |
| Tenericutes    | Green                            | Proteobacteria:Pseudomonas syringae group:4.1.1.20 :Diaminopimelate decarboxylase                                  |
|                | Green                            | Proteobacteria:Candidatus Baumannia cicadellinicola::                                                              |
|                | Red                              | Tenericutes:Mycoplasma:3.6.1.- :In phosphorus-containing anhydrides                                                |
|                | Red                              | Tenericutes:Ureaplasma:3.6.-.- :Acting on acid anhydrides                                                          |
| Tenericutes    | Green                            | Tenericutes:Mycoplasma genitalium:6.3.5.7 :Glutaminyl-tRNA synthase (glutamine-hydrolyzing)                        |
|                | Green                            | Tenericutes:Mycoplasma genitalium:6.1.1.22 :Asparagine--tRNA ligase                                                |

15

16

1 **Supplementary Figure 15:** Schema for metabolomics analysis used in the study (**Related to**  
 2 **Figure 2**)

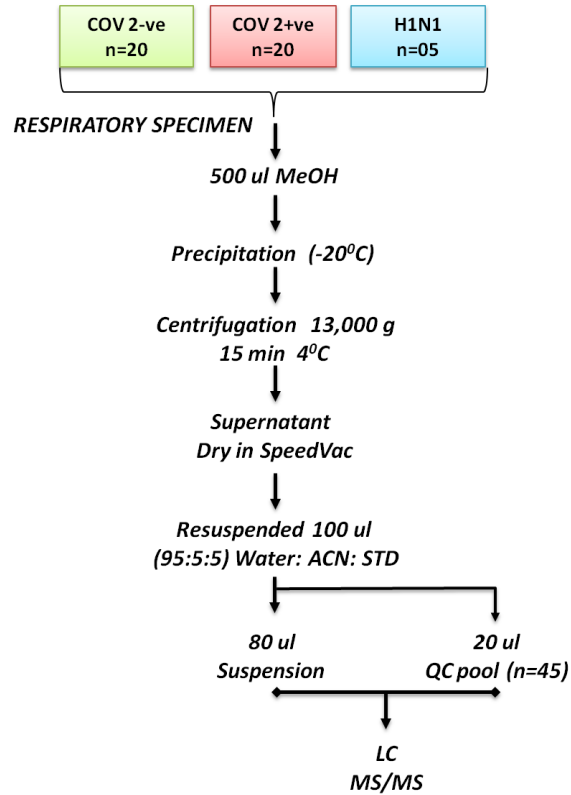

3  
 4 **Supplementary Figure 16:** Total no of metabolites differentially regulated and their intersection  
 5 in COV2+ vs. COV2- and COV2+ vs. Influenza A H1N1 pdm 2009 positive cases is shown. Red  
 6 denotes proteins up regulated and green denoted the proteins down regulated. (**Related to Figure**  
 7 **2**)

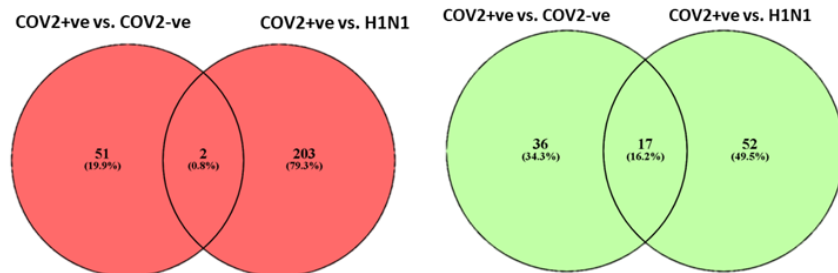

1 **Supplementary Figure 17:** Loading plot for the partial least square discriminant analysis  
2 showing clear segregation of COVID-19 positive patients from COVID-19 negative and  
3 Influenza A H1N1 pdm 2009 positive cases patients based on metabolomics evaluation (**Related**  
4 **to Figure 2**)

5

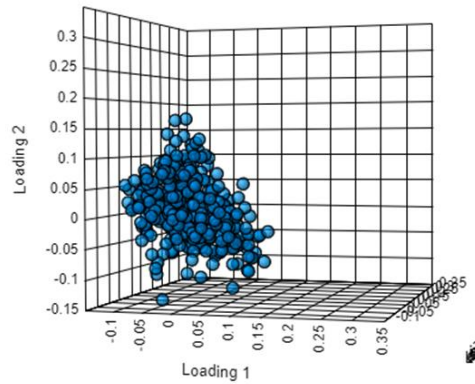

6

7

8 **Supplementary Figure 18:** Univariate area under the receiver operating curve analysis for N-  
9 Acetylserotonin(AUC=0.99 CI (0.975-1)) and Azelaic acid (AUC=0.941 CI (0.85-1)) (**Related**  
10 **to Figure 2**)

11

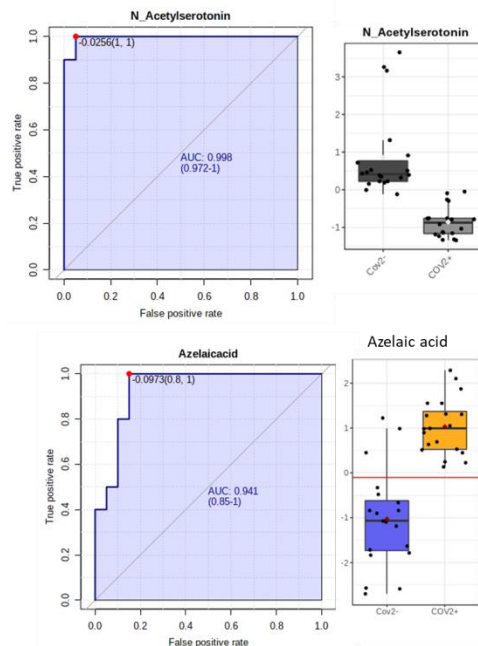

12

1 **Supplementary Figure 19:** Correlation plot showing top 54 proteins and metabolites which  
 2 showed significant correlation with the CT values of COVID-19 positive patients. Green  
 3 highlight on the molecules are positively correlated to the CT values and Red color highlight on  
 4 the molecules denotes negative correlation with the CT values (RT-PCR). **(Related to Figure 3)**

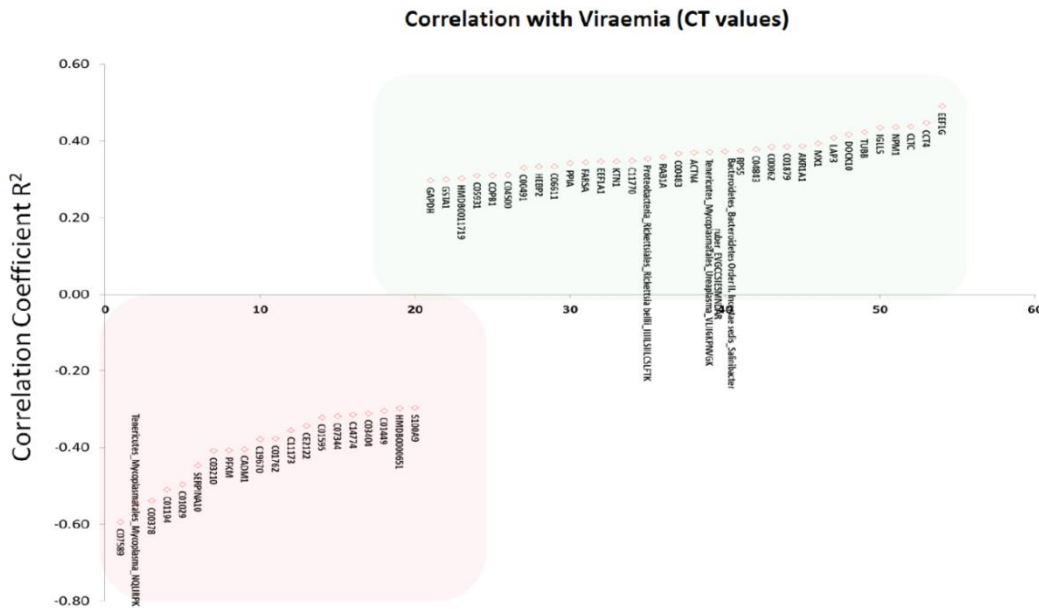

5  
 6 **Supplementary Figure 20:** BTM enrichment analysis of respiratory proteome identifies  
 7 immune clusters represented as web plot showing the number of proteins present in each module,  
 8 red= upregulated in COVID-19 respiratory specimen and green= downregulated in COVID-19  
 9 respiratory specimen. **(Related to Figure 3)**

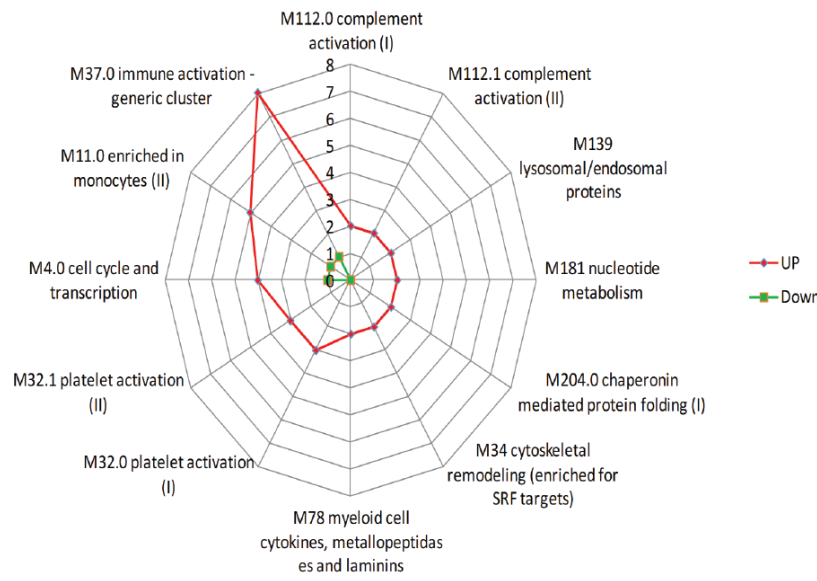

1 **Supplementary Figure 21:** Volcano plot showing differentially expressed multi-omics data in  
 2 asymptomatic COVID-19 as compared to symptomatic COVID-19 respiratory specimen. Pink  
 3 dots are significant ( $p < 0.05$ ,  $FC > 1.5$ ), Partial least square discriminant analysis showing clear  
 4 segregation of symptomatic COVID-19 patients (Red dots) from asymptomatic COVID-19  
 5 patients (Green dots) based on Multi-omics estimations, Heat map and hierarchical cluster  
 6 analysis of the multi-omics identified ( $p < 0.05$ ) show clear segregation of COVID-19  
 7 symptomatic (Red bar) from asymptomatic COVID-19 (Green bar) patients. The expression is  
 8 given in the range as Dark brown= upregulated, Blue= downregulated and white= unregulated.  
 9 **(Related to Figure 3)**

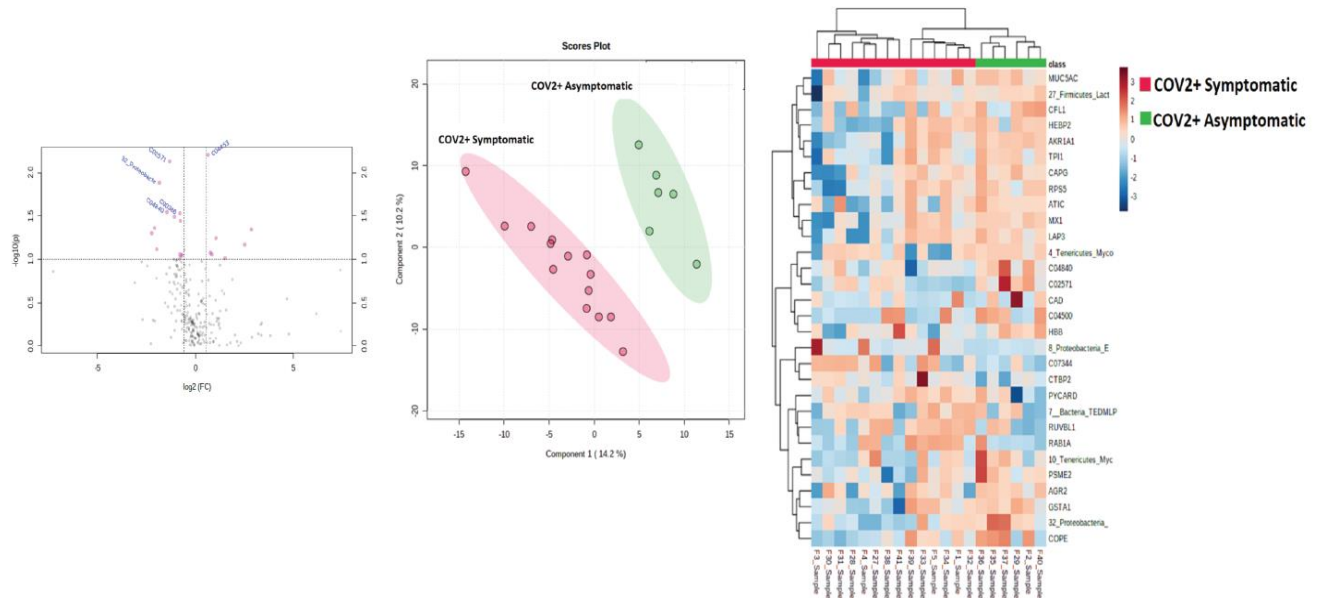

10

11 **Supplementary Figure 22:** Area under the receiver operating curve analysis along with fold  
 12 change and significance of bio-molecules capable of segregating COVID-19 symptomatic from  
 13 asymptomatic COVID-19 patients. **(Related to Figure 3)**

| Parameters                                                                  | AUC   | Pval  | FC (log)<br>Symptomatic<br>vs.<br>Asymptomatic |
|-----------------------------------------------------------------------------|-------|-------|------------------------------------------------|
| Proteobacteria_Enterobacterales_Klebsiell<br>a_pneumoniae_VAVLXAAGGIQALALLK | 0.845 | 0.013 | 2.33                                           |
| CTBP2                                                                       | 0.774 | 0.045 | 1.59                                           |
| C04453                                                                      | 0.917 | 0.006 | 0.61                                           |
| C00386                                                                      | 0.714 | 0.029 | -0.65                                          |
| C00555                                                                      | 0.786 | 0.036 | -1.04                                          |
| C02571                                                                      | 0.845 | 0.007 | -1.13                                          |
| C04840                                                                      | 0.821 | 0.029 | -1.39                                          |
| PSME2                                                                       | 0.810 | 0.044 | -1.73                                          |
| Proteobacteria_Desulfobacterales_Desulfa<br>tibacillum_DQEGQDVLIFIDNIFR     | 0.821 | 0.013 | -1.81                                          |
| COPE                                                                        | 0.726 | 0.050 | -2.19                                          |
| AKR1A1                                                                      | 0.798 | 0.032 | -3.05                                          |

14

1 **Supplementary Figure 23:** Permutation statistical analysis for prediction class probability of  
2 MX1 (1000 permutation) show  $p < 0.01$ . **(Related to Figure 4)**

3

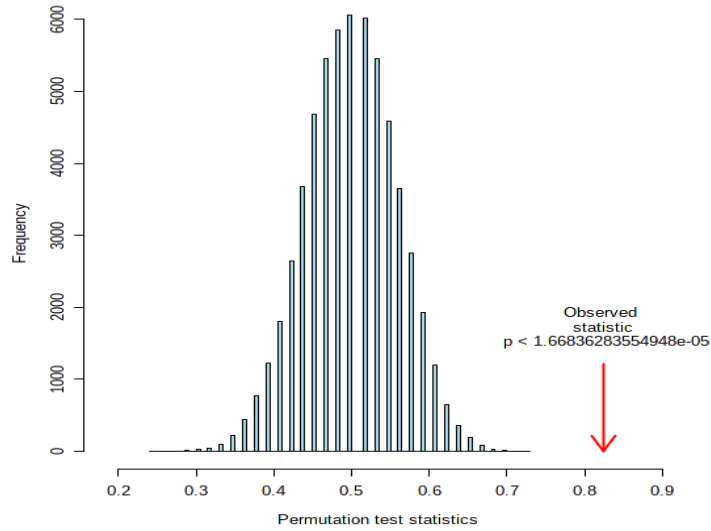

4

5 **Supplementary Figure 24:** Permutation statistical analysis for prediction class probability of  
6 MX1 and WARS (1000 permutation) together show  $p < 0.01$ . **(Related to Figure 4)**

7

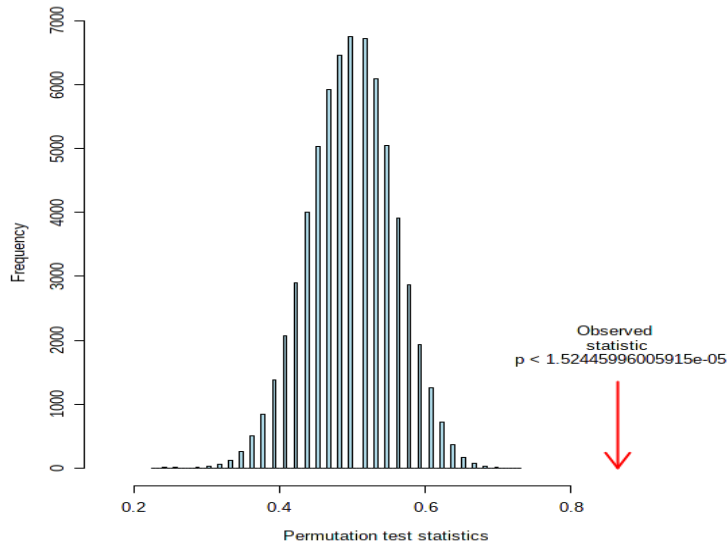

8

9

10



1 **Supplementary Figure 25: KEGG pathway enrichment analysis for proteins upregulated in the**  
 2 **respiratory specimen of COVID-19 positive patients as compared to COVID-19 negative**  
 3 **patients showing significant enrichment of proteins lined to Glycolysis/ Gluconeogenesis.**  
 4 **(Related to Figure 1)**

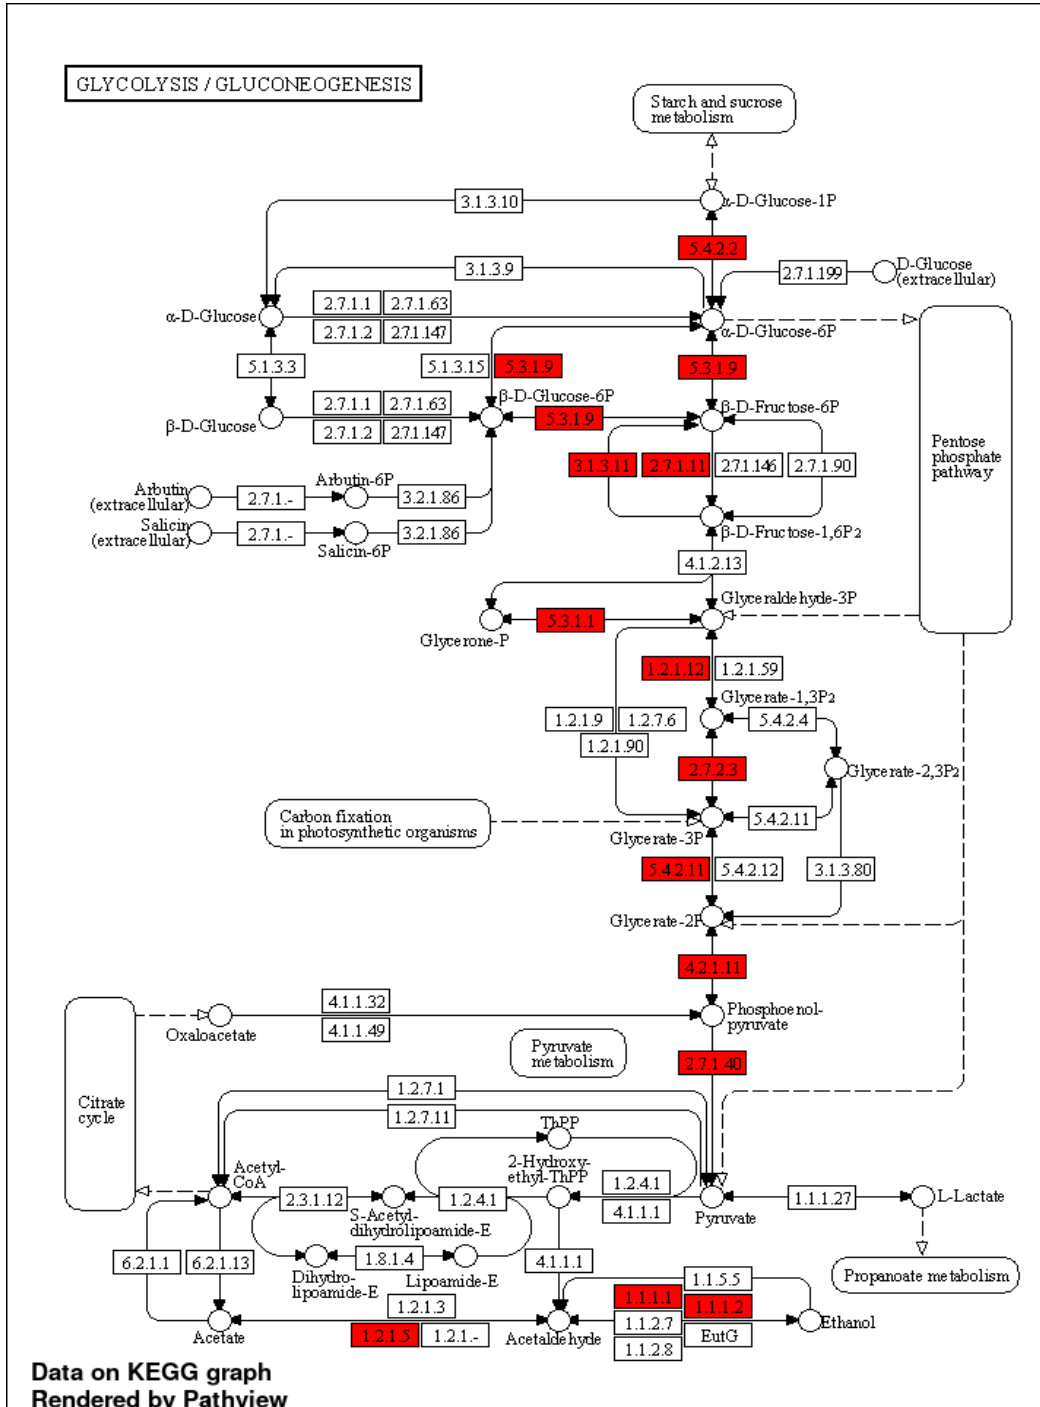

5  
 6

1

2 **Supplementary Figure 26:** Correlation of MX1 and WARS Elisa levels with the respiratory rate  
3 and SOFA score of COVID 19 patients. **(Related to Figure 4)**

4

| Parameters       | MX1                 | WARS               |
|------------------|---------------------|--------------------|
| Respiratory Rate | r=0.65,<br>p=0.0024 | r=0.48,<br>p=0.041 |
| SOFA Score       | r=0.71,<br>p=0.0001 | r=0.53,<br>p=0.047 |

5

6

7 Supplementary figure 27: **(Related to Figure 4)**

8 Correlation Plot OF MX1 and WARS with MIF, VEGF-A, IL-6 and Immune interferon gamma

9 Red documents p<0.05 and R>0.5

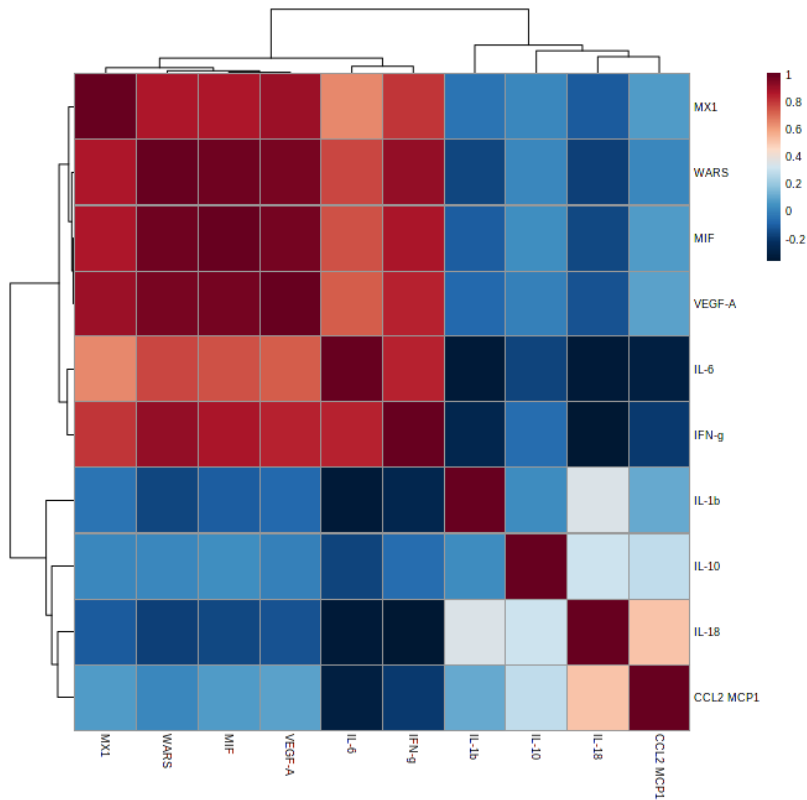

10

11

1

2

3 **Supplement Figure 28 (Related to Figure 4)**

4 Quantitative assessment of MX1 and WARS in the respiratory specimen of the test cohort  
5 (n=200; severe infection: 50, non-severe infection: 50 and RTPCR based COVID-19 positive  
6 specimen. COVID-19 positive specimen show significant increase in MX1 and WARS levels in  
7 COVID-19 positive particularly in patients with severe infection as compared to COVID-19  
8 negative (upper panel; FC> 2, p<0.05). Lower panel documents AUROC value for prediction of  
9 COV2+ for MX1 and WARS in COVID-19 patients.

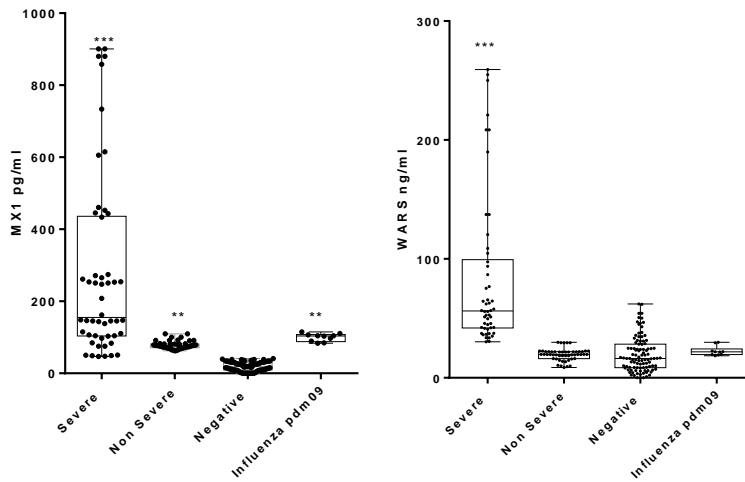

10

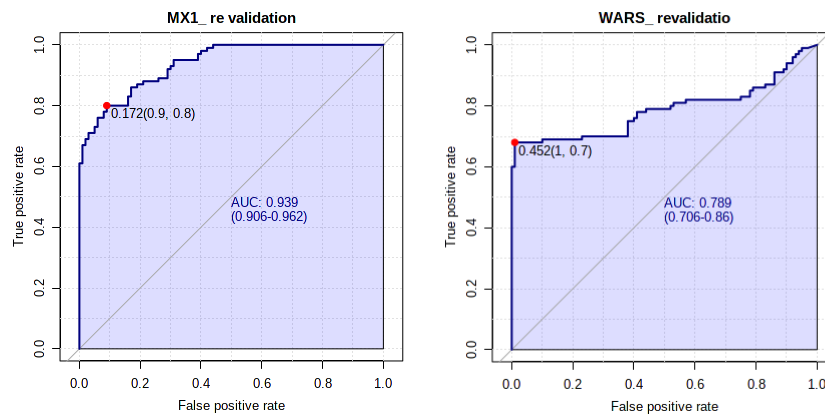

11

12

13

1 **Supplementary Figure 29 (Related to Figure 4)**

2

3 Combined AUROC of MX1 and WARS and 2000 samples bootstrapping analysis in the test  
4 cohort (n=200; severe infection: 50, non-severe infection: 50 and RTPCR based COVID-19  
5 positive specimen).

6

7

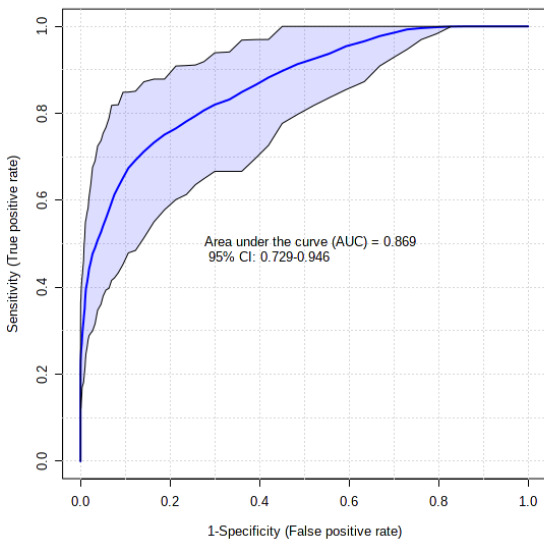

8

9

10

11

12

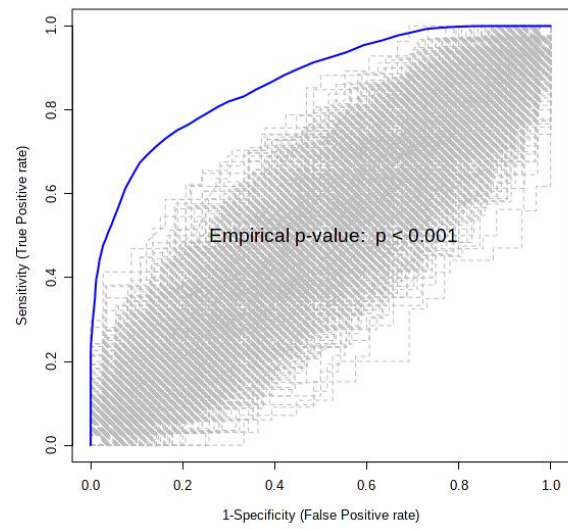

Supplement: mmc1.pdf [file mmc1.pdf]
